# Supplementary material for: Identification and Characterization of Clostridium perfringens Atypical CPB2 Toxin in Cell Cultures and Field Samples Using Monoclonal Antibodies
Source: MDPI journal article supplement (doi:10.3390/toxins14110796), 2022-11-17

Figure S1. Detection of atypical CPB2 in some field samples by PCR. F.: Faeces; I.C: Intestinal Content; R.S: Rectal Swab. PC: Positive Control (*C. perfringens* atypical *cpb2*+ strain); NC: Negative Control (*C. perfringens* *cpb2*- strain). Molecular ladder is reported.

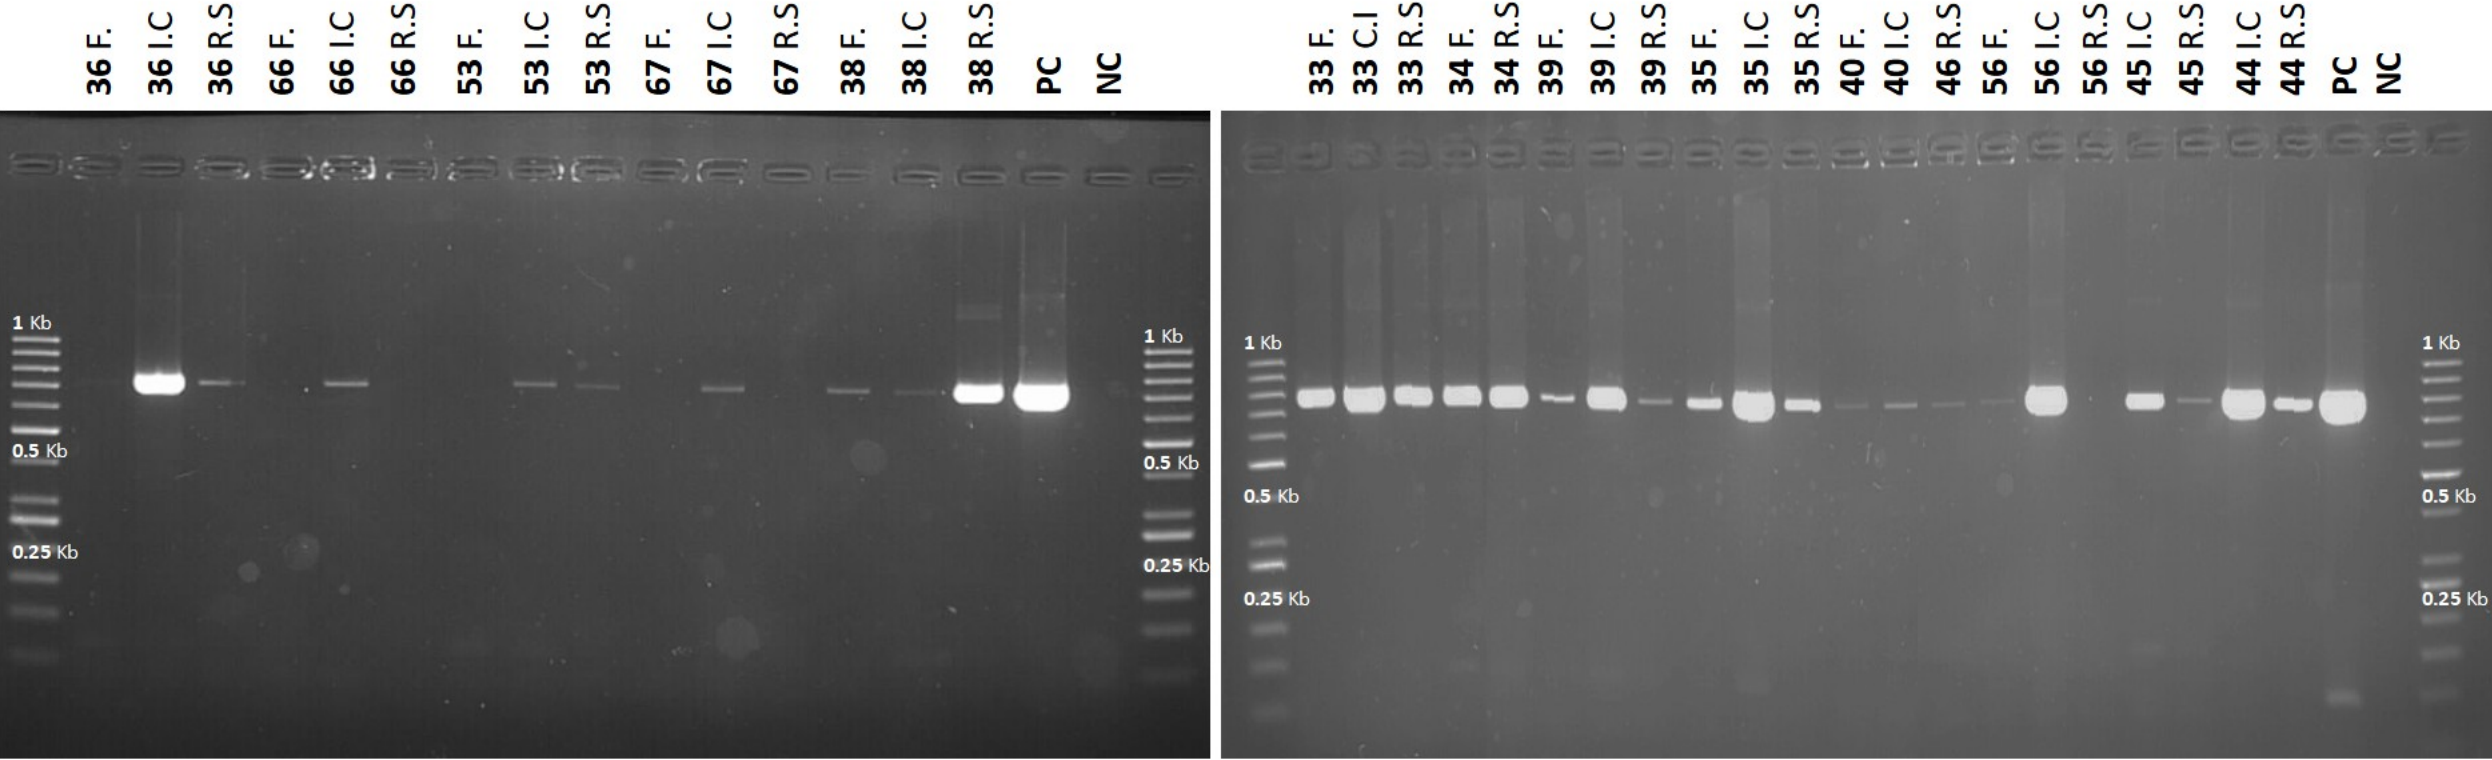

Supplement: s1 [file s1]
