# Supplementary material for: Identification and Characterization of Clostridium perfringens Atypical CPB2 Toxin in Cell Cultures and Field Samples Using Monoclonal Antibodies
Source: MDPI journal article supplement (doi:10.3390/toxins14110796), 2022-11-17
Supplement: s1 [file s1]

Table S4. Detection of atypical CPB2 on field samples with both PCR and sELISA. OD<sub>450</sub> values and PCR outcomes are shown. ND: not determined.

| Sample number | Faeces |          | Intestinal content |          | Rectal swab |          |
|---------------|--------|----------|--------------------|----------|-------------|----------|
|               | sELISA | PCR      | sELISA             | PCR      | sELISA      | PCR      |
| 1             | 0.084  | Negative | 0.087              | Negative | 0.071       | Negative |
| 2             | 0.067  | Negative | 0.093              | Negative | 0.06        | Negative |
| 3             | 0.086  | Negative | 0.07               | Negative | 0.063       | Negative |
| 4             | 0.058  | Negative | 0.053              | Negative | 0.053       | Negative |
| 5             | ND     | ND       | 0.061              | Negative | ND          | ND       |
| 6             | 0.063  | Negative | 0.077              | Negative | 0.067       | Negative |
| 7             | 0.057  | Negative | 0.056              | Negative | 0.05        | Negative |
| 8             | 0.05   | Negative | 0.051              | Negative | 0.048       | Negative |
| 9             | 0.05   | Negative | 0.05               | Negative | 0.05        | Negative |
| 10            | 0.049  | Negative | 0.052              | Negative | 0.051       | Negative |
| 11            | 0.079  | Negative | 0.069              | Negative | 0.064       | Negative |
| 12            | 0.076  | Negative | 0.065              | Negative | 0.06        | Negative |
| 13            | 0.08   | Negative | 0.107              | Negative | 0.071       | Negative |
| 14            | ND     | ND       | 0.075              | Negative | 0.061       | Negative |
| 15            | 0.089  | Negative | 0.054              | Negative | 0.08        | Negative |
| 16            | 0.05   | Negative | 0.071              | Negative | 0.056       | Negative |
| 17            | ND     | ND       | 0.093              | Negative | 0.094       | Negative |
| 18            | 0.054  | Negative | 0.053              | Negative | 0.049       | Negative |
| 19            | 0.071  | Negative | 0.073              | Negative | 0.086       | Negative |
| 20            | 0.053  | Negative | 0.076              | Negative | 0.05        | Negative |
| 21            | 0.053  | Negative | 0.05               | Negative | 0.058       | Negative |
| 22            | 0.051  | Negative | 0.075              | Negative | 0.051       | Negative |
| 23            | 0.063  | Negative | 0.069              | Negative | 0.054       | Negative |
| 24            | ND     | ND       | 0.078              | Negative | ND          | ND       |
| 25            | 0.08   | Negative | 0.055              | Negative | 0.131       | Negative |
| 26            | 0.306  | Negative | 0.062              | Negative | 0.059       | Negative |
| 27            | 0.28   | Negative | 0.05               | Negative | 0.124       | Negative |
| 28            | ND     | Negative | 0.126              | Negative | 0.051       | Negative |
| 29            | 0.39   | Negative | 0.091              | Negative | 0.209       | Negative |
| 30            | 0.086  | Negative | 0.183              | Negative | 0.164       | Negative |
