# Supplementary material for: Identification and Characterization of Clostridium perfringens Atypical CPB2 Toxin in Cell Cultures and Field Samples Using Monoclonal Antibodies
Source: MDPI journal article supplement (doi:10.3390/toxins14110796), 2022-11-17
Supplement: s1 [file s1]

Table S2. Detection of atypical CPB2 on strain culture supernatants genotyped as consensus *cpb2*+. sELISA with 5C11E6, 2G3G6, 4E10E11 and conformation-dependent 23E6E6 Mabs. OD<sub>450</sub> values are shown.

|               | MAbs   |       |         |        |
|---------------|--------|-------|---------|--------|
| Strain number | 5C11E6 | 2G3G6 | 4E10E11 | 23E6E6 |
| <b>C27</b>    | 0,058  | 0,053 | 0,056   | ND     |
| <b>C28</b>    | 0,58   | 0,24  | 0,31    | 0,156  |
| <b>C29</b>    | 0,062  | 0,064 | 0,055   | 0,055  |
| <b>C30</b>    | 0,068  | 0,058 | 0,061   | 0,056  |
| <b>C31</b>    | 0,072  | 0,076 | 0,073   | 0,064  |
| <b>C32</b>    | 0,073  | 0,059 | 0,1     | 0,066  |
| <b>C33</b>    | 0,059  | 0,104 | 0,071   | 0,066  |
| <b>C34</b>    | 0,063  | 0,074 | 0,13    | 0,064  |
| <b>C35</b>    | 0,058  | 0,093 | 0,074   | 0,07   |
| <b>C36</b>    | 0,064  | 0,078 | 0,122   | 0,095  |
| <b>C37</b>    | 0,061  | 0,11  | 0,083   | 0,058  |
| <b>C38</b>    | 0,06   | 0,049 | 0,085   | 0,055  |
| <b>C39</b>    | 0,058  | 0,051 | 0,1     | 0,053  |
| <b>C40</b>    | 0,053  | 0,056 | 0,054   | 0,057  |
| <b>C41</b>    | 0,05   | 0,056 | 0,06    | 0,063  |
| <b>C42</b>    | 0,069  | 0,068 | 0,088   | 0,077  |
| <b>C43</b>    | 0,057  | 0,056 | 0,055   | 0,057  |
| <b>C44</b>    | 0,051  | 0,045 | 0,05    | 0,051  |
| <b>C45</b>    | 0,047  | 0,058 | 0,057   | 0,056  |
| <b>C46</b>    | 0,049  | 0,064 | 0,066   | 0,054  |
| <b>C47</b>    | 0,055  | 0,054 | 0,075   | 0,07   |
| <b>C48</b>    | 0,048  | 0,053 | 0,054   | 0,05   |
| <b>C49</b>    | 0,047  | 0,047 | 0,05    | 0,057  |
| <b>C50</b>    | 0,052  | 0,06  | 0,069   | 0,063  |
| <b>C51</b>    | 0,054  | 0,066 | 0,075   | 0,07   |
| <b>C52</b>    | 0,053  | 0,067 | 0,072   | 0,074  |
| <b>C53</b>    | 0,054  | 0,053 | 0,062   | 0,065  |
