# Supplementary material for: Identification and Characterization of Clostridium perfringens Atypical CPB2 Toxin in Cell Cultures and Field Samples Using Monoclonal Antibodies
Source: MDPI journal article supplement (doi:10.3390/toxins14110796), 2022-11-17
Supplement: s1 [file s1]

Table S3. Detection of atypical CPB2 on strain culture supernatants genotyped as *cpb2*-. sELISA with 5C11E6, 2G3G6, 4E10E11 and conformation-dependent 23E6E6 Mabs. OD<sub>450</sub> values are shown.

|               | MAbs   |       |         |        |
|---------------|--------|-------|---------|--------|
| Strain number | 5C11E6 | 2G3G6 | 4E10E11 | 23E6E6 |
| <b>C54</b>    | 0,057  | 0,065 | 0,11    | 0,064  |
| <b>C55</b>    | 0,067  | 0,059 | 0,11    | 0,062  |
| <b>C56</b>    | 0,067  | 0,062 | 0,107   | 0,069  |
| <b>C57</b>    | 0,073  | 0,059 | 0,104   | 0,065  |
| <b>C58</b>    | 0,071  | 0,061 | 0,106   | 0,062  |
| <b>C59</b>    | 0,058  | 0,062 | 0,1     | 0,056  |
| <b>C60</b>    | 0,056  | 0,054 | 0,108   | 0,062  |
| <b>C61</b>    | 0,052  | 0,054 | 0,134   | 0,062  |
| <b>C62</b>    | 0,051  | 0,052 | 0,12    | 0,055  |
| <b>C63</b>    | 0,055  | 0,056 | 0,09    | 0,119  |
| <b>C64</b>    | 0,148  | 0,067 | 0,065   | 0,065  |
| <b>C65</b>    | 0,142  | 0,062 | 0,072   | 0,065  |
| <b>C66</b>    | 0,75   | 0,49  | 0,297   | 0,1    |
