# Supplementary material for: Identification and Characterization of Clostridium perfringens Atypical CPB2 Toxin in Cell Cultures and Field Samples Using Monoclonal Antibodies
Source: MDPI journal article supplement (doi:10.3390/toxins14110796), 2022-11-17
Supplement: s1 [file s1]

Table S1. Detection of atypical CPB2 on strain culture supernatants genotyped as atypical *cpb2*+. sELISA with 5C11E6, 2G3G6, 4E10E11 and conformation-dependent 23E6E6 Mabs. OD<sub>450</sub> values are shown.

|               | MAbs   |       |         |        |
|---------------|--------|-------|---------|--------|
|               |        |       |         |        |
| Strain number | 5C11E6 | 2G3G6 | 4E10E11 | 23E6E6 |
| <b>C20</b>    | 0,1    | 0,096 | 0,12    | 0,1    |
| <b>C21</b>    | 0,099  | 0,078 | 0,082   | 0,067  |
| <b>C22</b>    | 0,06   | 0,062 | 0,054   | 0,054  |
| <b>C23</b>    | 0,07   | 0,066 | 0,079   | 0,063  |
| <b>C24</b>    | 0,052  | 0,07  | 0,052   | 0,061  |
| <b>C25</b>    | 0,084  | 0,079 | 0,076   | 0,063  |
| <b>C26</b>    | 0,048  | 0,059 | 0,049   | 0,086  |
