# Supplementary material for: Identification and Characterization of Clostridium perfringens Atypical CPB2 Toxin in Cell Cultures and Field Samples Using Monoclonal Antibodies
Source: Toxins (Basel). 2022 Nov 17;14(11):796. doi: 10.3390/toxins14110796 (PMC9693285; doi:10.3390/toxins14110796)
Supplement: Supplementary file 1 [file toxins-14-00796-s001.zip]

Archive with 5 entries (5 files):
- Figure S1 final.pdf
- Table S1 final.pdf
- Table S2 final.pdf
- Table S3 final.pdf
- Table S4 final.pdf
